# Supplementary material
Source: PubMed Central journal article supplement (PMC9197983)
Supplement: NIHMS1808748-supplement-SI.pdf [file NIHMS1808748-supplement-SI.pdf]

## Supporting Information

### Delta Machine Learning to Improve Scoring-Ranking-Screening Performances of Protein-Ligand Scoring Functions

*Chao Yang<sup>1</sup> and Yingkai Zhang<sup>1,2\*</sup>*

<sup>1</sup>Department of Chemistry, New York University, New York, NY 10003, United States

<sup>2</sup>NYU-ECNU Center for Computational Chemistry at NYU Shanghai 200062, Shanghai, China

Email: [yingkai.zhang@nyu.edu](mailto:yingkai.zhang@nyu.edu)

**Table S1.** Training and validation sets.

|                | Subset      | Source                                                                                                                                             | Size | Binding affinity             | Note                                                             |
|----------------|-------------|----------------------------------------------------------------------------------------------------------------------------------------------------|------|------------------------------|------------------------------------------------------------------|
| Training set   | Binder set  | 6816 binders from $\Delta_{\text{vina-XGB}}$ 's training set                                                                                       | 9117 | $\text{pK}_d(\text{exp})$    | Local optimized poses with and without waters                    |
|                |             | 1556 weak binders ( $\text{pK}_d < 6$ ) and 510 strong binders ( $\text{pK}_d > 9$ ) from PDBbind v2018 general set                                |      |                              |                                                                  |
|                |             | 235 strong binders obtained by flexible-redocking ( $\text{pK}_d > 9$ and $\text{RMSD} \leq 1.0$ )                                                 |      |                              | Docked poses with and without waters                             |
|                | Decoy set 1 | 6321 decoys from $\Delta_{\text{vina-XGB}}$ 's training set                                                                                        | 7111 | $\text{pK}_d(\text{est1})^a$ | CSAR decoys without water                                        |
|                |             | 790 decoys obtained by flexible docking of very weak binders ( $\text{pK}_d < 3$ ) from BindingDB $K_d$ data                                       |      | $\text{pK}_d(\text{est2})^b$ | Docked decoys with and without waters                            |
|                | Decoy set 2 | E2E top1 docked poses of train Binder set ( $\text{RMSD}^{\text{E2E}} - \text{RMSD}^{\text{opt}} > 0.5$ and $ \text{pK}_d - \text{Lin\_F9}  < 3$ ) | 5715 | $\text{pK}_d(\text{exp})$    | Docked poses with and without waters                             |
| Validation set | Binder set  | Same as $\Delta_{\text{vina-XGB}}$ 's validation set                                                                                               | 946  | $\text{pK}_d(\text{exp})$    | Local optimized poses with and without waters, and crystal poses |
|                | Decoy set   | E2E top1 docked poses of validation Binder set                                                                                                     | 632  | $\text{pK}_d(\text{exp})$    | Docked poses with and without waters                             |

<sup>a</sup> $\text{pK}_d(\text{est1})$ : the estimated  $\text{pK}_d$  for CSAR decoys; <sup>b</sup> $\text{pK}_d(\text{est2})$ : the estimated  $\text{pK}_d$  for BindingDB docked decoys.

**Table S2.** Feature set of  $\Delta_{\text{Lin\_F9}}\text{XGB}$ .

| Feature type          | Detail                                                                                                                                                            | Number |
|-----------------------|-------------------------------------------------------------------------------------------------------------------------------------------------------------------|--------|
| bSASA features        | bSASA ligand terms                                                                                                                                                | 9      |
|                       | bSASA protein terms                                                                                                                                               | 9      |
|                       | bSASA complex terms                                                                                                                                               | 10     |
| Vina features         | polar-polar gauss terms                                                                                                                                           | 7      |
|                       | polar-nonpolar gauss terms                                                                                                                                        | 7      |
|                       | nonpolar-nonpolar gauss terms                                                                                                                                     | 7      |
|                       | hydrogen bond gauss terms                                                                                                                                         | 5      |
|                       | anti-hydrogen bond gauss terms                                                                                                                                    | 5      |
|                       | metal bond gauss term                                                                                                                                             | 6      |
|                       | ligand terms (number of torsions, number of rotors, ligand length, number of heavy atoms, number of hydrophobic atoms, maximum number of possible hydrogen bonds) | 6      |
|                       | repulsion, ad4_solvation, electrostatic                                                                                                                           | 5      |
| Bridge water features | Number of bridge waters                                                                                                                                           |        |
|                       | Sum of Lin_F9 scores of protein-bridge water                                                                                                                      | 3      |
|                       | Sum of Lin_F9 scores of ligand-bridge water                                                                                                                       |        |
| Beta-cluster features | ligand beta score, ligand coverage                                                                                                                                | 2      |
|                       | ligand efficiency <sup>a</sup>                                                                                                                                    | 1      |
| Ligand features       | HeavyAtomMolWt, NumValenceElectrons, FpDensityMorgan{1,2,3}, LabuteASA, TPSA, NHOHCount, MolLogP, MolMR                                                           | 10     |

<sup>a</sup>Ligand efficiency:  $\text{pK}_d(\text{Lin\_F9})$  divided by number of heavy atoms.

**Table S3.** The performances of  $\Delta_{\text{Lin}_F9}\text{XGB}$  on the train and validation sets.

| Dataset        | Pearson's R | RMSE (in pK <sub>d</sub> ) | MAE (in pK <sub>d</sub> ) |
|----------------|-------------|----------------------------|---------------------------|
| Train set      | 1.000       | 0.051                      | 0.035                     |
| Validation set | 0.789       | 1.448                      | 1.146                     |

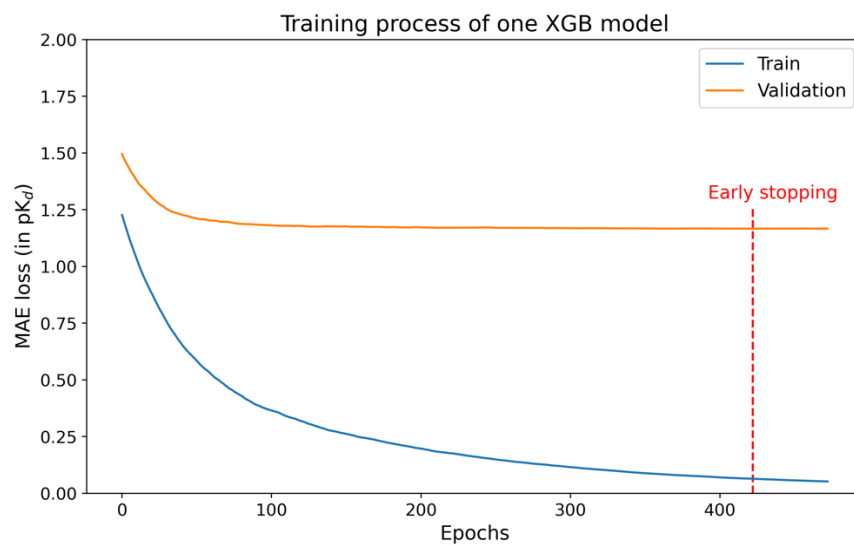

**Table S4.** CASF-2016 screening power at top1%, 5%, 10% for Vina,  $\Delta_{\text{VinaXGB}}$ ,  $\Delta_{\text{Lin}_F9\text{XGB}}$ . (EF: enhancement factor, SC: success rate)

| Scoring Functions                  | EF <sub>1%</sub> | EF <sub>5%</sub> | EF <sub>10%</sub> | SC <sub>1%</sub> | SC <sub>5%</sub> | SC <sub>10%</sub> |
|------------------------------------|------------------|------------------|-------------------|------------------|------------------|-------------------|
| Vina                               | 7.70             | 4.01             | 2.87              | 29.8%            | 40.4%            | 50.9%             |
| $\Delta_{\text{VinaXGB}}$          | 13.14            | 4.30             | 2.91              | 36.8%            | 52.6%            | 61.4%             |
| $\Delta_{\text{Lin}_F9\text{XGB}}$ | 12.61            | 4.42             | 3.02              | 40.4%            | 59.6%            | 68.4%             |

**Table S5.** Mean AUC values comparison of Vina,  $\Delta_{\text{VinaRF}_{20}}$ , Lin\_F9 and  $\Delta_{\text{Lin}_F9\text{XGB}}$  on LIT-PCBA dataset.

| Target set     | Scoring Function |                               |              |                                    | PDB       | Number of | Number of |
|----------------|------------------|-------------------------------|--------------|------------------------------------|-----------|-----------|-----------|
|                | Vina             | $\Delta_{\text{VinaRF}_{20}}$ | Lin_F9       | $\Delta_{\text{Lin}_F9\text{XGB}}$ | Templates | Actives   | Inactives |
| ADRB2*         | 0.356            | <b>0.399</b>                  | 0.312        | 0.393                              | 4         | 17        | 312,433   |
| ALDH1          | 0.582            | 0.590                         | 0.586        | <b>0.715</b>                       | 2         | 7167      | 137,822   |
| ESR1-ago*      | 0.703            | 0.687                         | 0.675        | <b>0.713</b>                       | 15        | 13        | 5,582     |
| ESR1-ant*      | 0.660            | 0.681                         | 0.657        | <b>0.696</b>                       | 15        | 102       | 4,947     |
| FEN1           | <b>0.505</b>     | <b>0.505</b>                  | 0.463        | 0.460                              | 1         | 369       | 355,323   |
| GBA            | 0.620            | 0.595                         | <b>0.641</b> | 0.615                              | 3         | 166       | 294,202   |
| IDH1           | 0.592            | 0.510                         | <b>0.599</b> | 0.546                              | 10        | 39        | 361,691   |
| KAT2A          | 0.430            | 0.396                         | 0.419        | <b>0.566</b>                       | 1         | 194       | 348,257   |
| MAPK1*         | <b>0.643</b>     | 0.605                         | 0.606        | 0.591                              | 15        | 308       | 62,522    |
| MTORC1*        | 0.515            | 0.515                         | <b>0.536</b> | 0.523                              | 11        | 97        | 32,972    |
| OPRK1*         | 0.525            | 0.487                         | <b>0.874</b> | 0.851                              | 1         | 24        | 269,776   |
| PKM2           | 0.606            | <b>0.641</b>                  | 0.595        | 0.603                              | 2         | 546       | 245,485   |
| PPARG*         | <b>0.825</b>     | 0.815                         | 0.806        | 0.803                              | 15        | 27        | 5,210     |
| TP53*          | 0.609            | 0.596                         | <b>0.648</b> | 0.612                              | 6         | 79        | 4,168     |
| VDR            | <b>0.394</b>     | 0.373                         | 0.373        | 0.364                              | 1         | 882       | 355,094   |
| <b>Average</b> | 0.571            | 0.560                         | 0.586        | 0.603                              |           |           |           |

PDB templates same as the original benchmark used are highlighted in green color. The 8 targets using cell-based phenotypic assays are marked with \*.

## 48 Vina features

|                                                                                                                                                                                                                                                                                    |                                                                                                                                                                                                                                                                                                            |                                                                                                                                                                                                                                                                     |
|------------------------------------------------------------------------------------------------------------------------------------------------------------------------------------------------------------------------------------------------------------------------------------|------------------------------------------------------------------------------------------------------------------------------------------------------------------------------------------------------------------------------------------------------------------------------------------------------------|---------------------------------------------------------------------------------------------------------------------------------------------------------------------------------------------------------------------------------------------------------------------|
| <p><b>7 polar-polar gauss terms</b></p> <pre>polar_polar(o=-1.0,_w=0.5,_c=8) polar_polar(o= 0.0,_w=0.5,_c=8) polar_polar(o= 1.0,_w=0.5,_c=8) polar_polar(o= 2.0,_w=0.5,_c=8) polar_polar(o= 3.0,_w=0.5,_c=8) polar_polar(o= 4.0,_w=0.5,_c=8) polar_polar(o= 5.0,_w=0.5,_c=8)</pre> | <p><b>7 polar-nonpolar gauss terms</b></p> <pre>polar_nonpolar(o=-1.0,_w=0.5,_c=8) polar_nonpolar(o= 0.0,_w=0.5,_c=8) polar_nonpolar(o= 1.0,_w=0.5,_c=8) polar_nonpolar(o= 2.0,_w=0.5,_c=8) polar_nonpolar(o= 3.0,_w=0.5,_c=8) polar_nonpolar(o= 4.0,_w=0.5,_c=8) polar_nonpolar(o= 5.0,_w=0.5,_c=8)</pre> | <p><b>7 nonpolar-nonpolar gauss terms</b></p> <pre>nonpolar(o=-1.0,_w=0.5,_c=8) nonpolar(o= 0.0,_w=0.5,_c=8) nonpolar(o= 1.0,_w=0.5,_c=8) nonpolar(o= 2.0,_w=0.5,_c=8) nonpolar(o= 3.0,_w=0.5,_c=8) nonpolar(o= 4.0,_w=0.5,_c=8) nonpolar(o= 5.0,_w=0.5,_c=8)</pre> |
| <p><b>5 anti-h bond gauss terms</b></p> <pre>anti_h_bond(o=-1.0,_w=0.25,_c=8) anti_h_bond(o=-0.5,_w=0.25,_c=8) anti_h_bond(o= 0.0,_w=0.25,_c=8) anti_h_bond(o= 0.5,_w=0.25,_c=8) anti_h_bond(o= 1.0,_w=0.25,_c=8)</pre>                                                            | <p><b>5 h-bond gauss terms</b></p> <pre>h_bond(o=-1.0,_w=0.25,_c=8) h_bond(o=-0.5,_w=0.25,_c=8) h_bond(o= 0.0,_w=0.25,_c=8) h_bond(o= 0.5,_w=0.25,_c=8) h_bond(o= 1.0,_w=0.25,_c=8)</pre>                                                                                                                  | <p><b>6 metal bond gauss term</b></p> <pre>m_bond(o=-2.5,_w=0.25,_c=8) m_bond(o=-2.0,_w=0.25,_c=8) m_bond(o=-1.5,_w=0.25,_c=8) m_bond(o=-1.0,_w=0.25,_c=8) m_bond(o=-0.5,_w=0.25,_c=8) m_bond(o=0.0,_w=0.25,_c=8)</pre>                                             |
| <p><b>5 other terms</b></p> <pre>repulsion(o=0.0,_c=8) ad4_solvation(d-sigma=3.6,_s/q=0.01097,_c=8) ad4_solvation(d-sigma=3.6,_s/q=0,_c=8) electrostatic(i=1,_^=100,_c=8) electrostatic(i=2,_^=100,_c=8)</pre>                                                                     | <p><b>6 ligand-specific terms</b></p> <pre>num_tors_add num_rotors_add num_heavy_atoms num_hydrophobic_atoms ligand_max_num_h_bonds ligand_length</pre>                                                                                                                                                    |                                                                                                                                                                                                                                                                     |

**Figure S1.** Details of 48 Vina features used in  $\Delta_{\text{Lin}_F9\text{XGB}}$ . The polar and nonpolar atom types are characterized based on XScore atom types. A series of gauss terms are used to describe polar-polar, polar-nonpolar, nonpolar-nonpolar interactions, anti-hbond, hbond and metal bond in different distances. The parameter *o* and *\_w* represents the center and the width, respectively, of a gauss term. The anti-hbond term describes polar-polar atoms that can't possibly be hydrogen bond. For metal bond term, it describes metal-ligand interactions. For 6 ligand-specific terms and 5 other terms (1 repulsion term and 2 ad4\_solvation terms and 2 electrostatic terms), these terms are obtained from original Vina 58 features. The cutoff (*\_c*) distance is 8 Å.

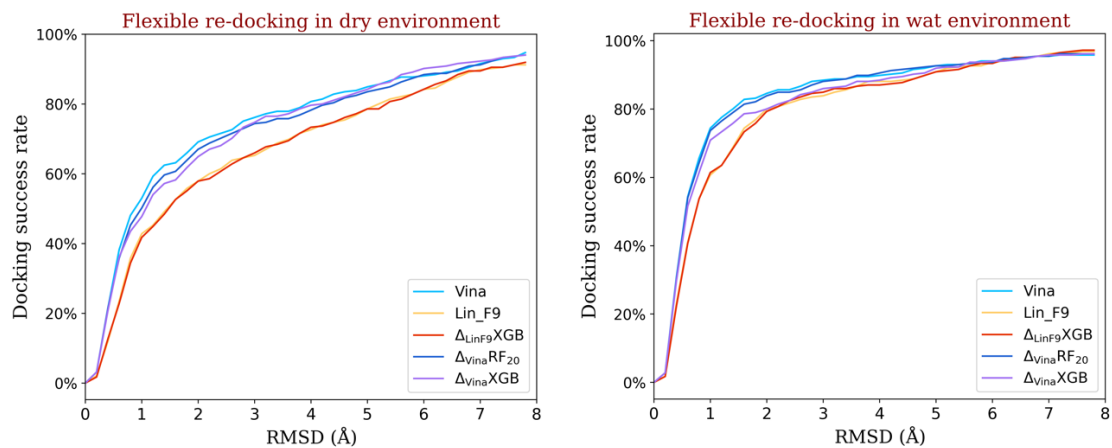

**Figure S2.** Success rates of flexible re-docking pose in different RMSD values. (A) and (B) show the docking success rates of the best-scored pose in dry environment and in water environment, respectively. Performances of  $\Delta_{\text{Lin}_F9}\text{XGB}$ , Lin\_F9 and Vina are colored red, orange and cyan, respectively.



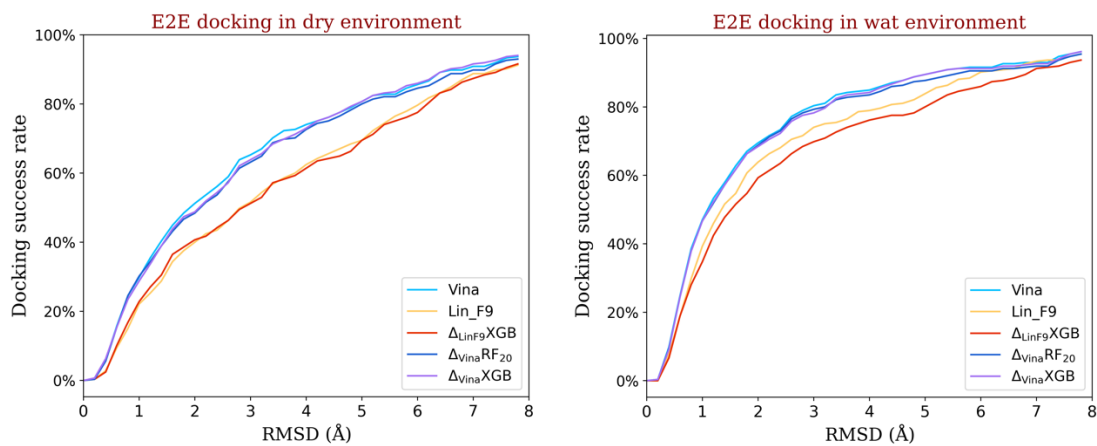

**Figure S3.** Success rates of E2E docking pose in different RMSD values. (A) and (B) show the docking success rates of the best-scored pose in dry environment and in water environment, respectively. Performances of  $\Delta_{\text{Lin\_F9}}\text{XGB}$ , Lin\_F9 and Vina are colored red, orange and cyan, respectively.

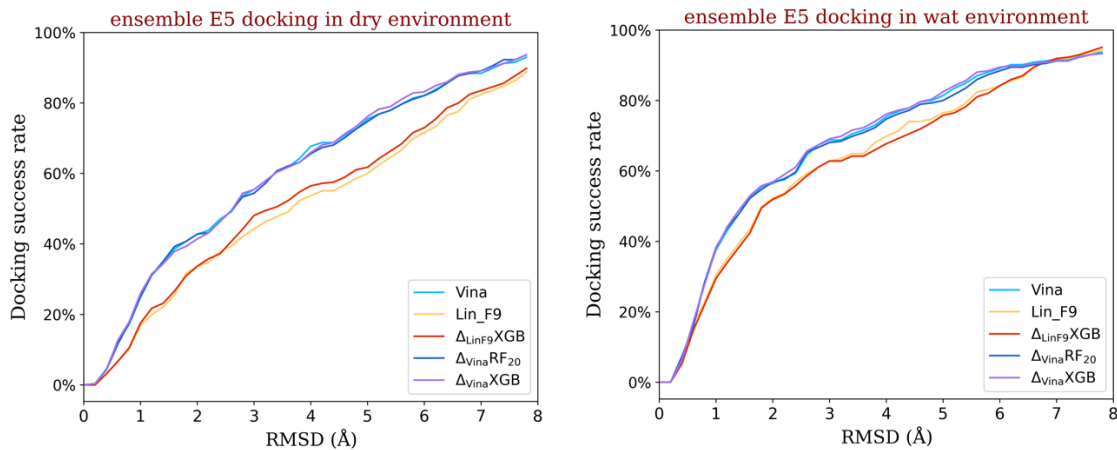

**Figure S4.** Success rates of ensemble E5 docking pose in different RMSD values. (A) and (B) show the docking success rates of the best-scored pose in dry environment and in water environment, respectively. Performances of  $\Delta_{\text{Lin}_F9}\text{XGB}$ , Lin\_F9 and Vina are colored red, orange and cyan, respectively.

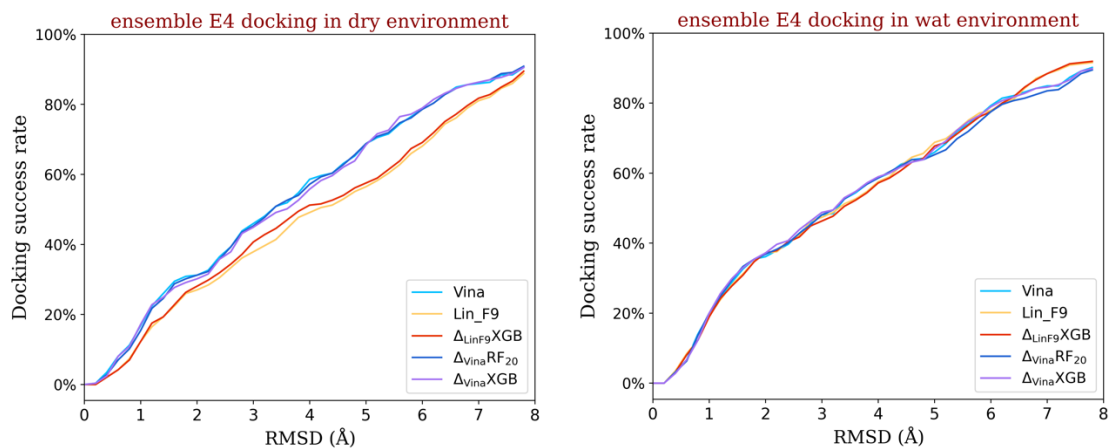

**Figure S5.** Success rates of ensemble E4 docking pose in different RMSD values. (A) and (B) show the docking success rates of the best-scored pose in dry environment and in water environment, respectively. Performances of  $\Delta_{Lin\_F9}XGB$ , Lin\_F9 and Vina are colored red, orange and cyan, respectively.

## BACE1 competition in D3R GC4

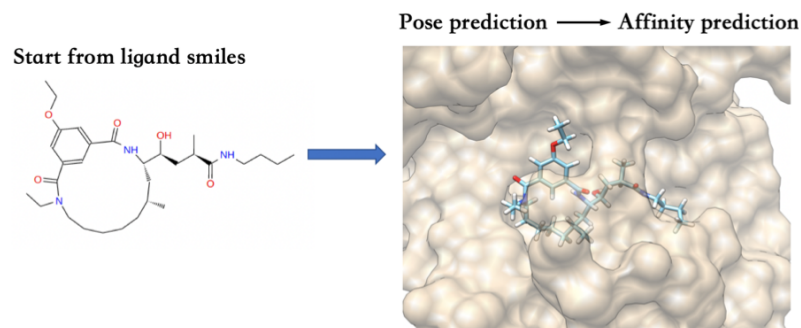

### Pose prediction protocol:

1. Find the maximum common substructure (MCS) between refMol and queryMol.
2. Set the MCS as template to generate queryMol conformers.
3. Minimize the queryMol conformers and align to the refMol to get the poses.
4. Use Vina local minimization to optimize the poses within protein environment.

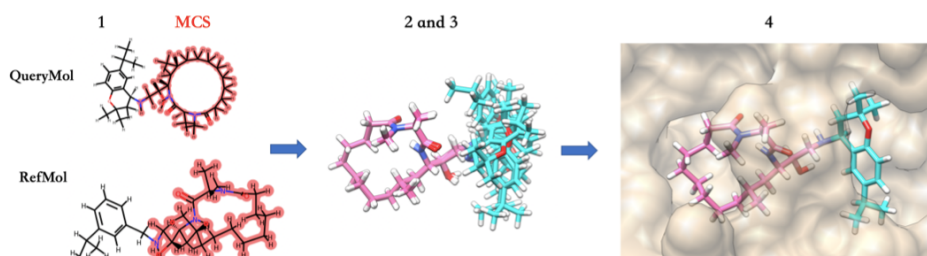

### Pose prediction performance:

| Protein environment |                                   | Median RMSD | Mean RMSD | STD RMSD |
|---------------------|-----------------------------------|-------------|-----------|----------|
| Stage 1a            | Global_min_conformer <sup>1</sup> | 0.74        | 0.78      | 0.29     |
|                     | Receptor_ensemble <sup>2</sup>    | 0.81        | 0.84      | 0.36     |
| Stage 1b            | Receptor_self_nowat               | 0.66        | 0.77      | 0.37     |
|                     | Receptor_self_wat                 | 0.64        | 0.74      | 0.31     |

<sup>1</sup> Global\_min\_conformer: lowest energy conformer using MMFF94 energy calculation.

<sup>2</sup> Receptor\_ensemble: BACE1 macrocyclic ensemble structures collected from PDB database.

### • D3R BACE1 20 macrocyclic ligands

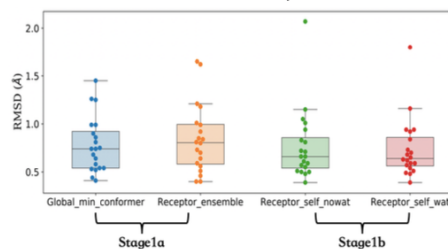

**Figure S6.** Pose prediction protocol of similarity-based constraint docking method and its performance on BACE1 Stage1a and Stage 1b.

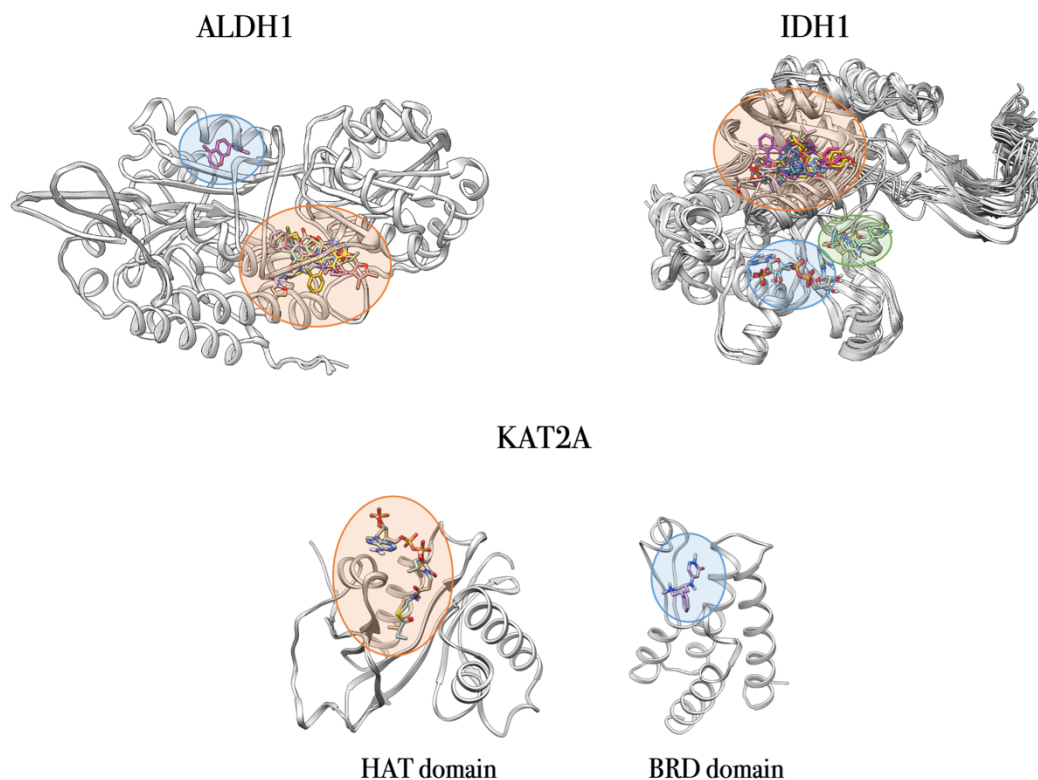

**Figure S7.** Three target sets (ALDH1, IDH1 and KAT2A) in LIT-PCBA benchmark have more than one ligand binding site in the PDB templates. For each target set, the selected docking site used in our study is highlighted in orange color. For ALDH1, the orthosteric aldehyde binding site was selected as the docking site. For IDH1, the well-known allosteric binding site was selected as the docking site. For KAT2A, the catalytic site at HAT domain was selected as the docking site.

| Target                                       | Notes                                                                                                                                                                                                                                                                                                               |
|----------------------------------------------|---------------------------------------------------------------------------------------------------------------------------------------------------------------------------------------------------------------------------------------------------------------------------------------------------------------------|
| ALDH1<br>( <a href="#">bioassay/1030</a> )   | Enzymatic assay, most of current available co-crystallized inhibitors bind to aldehyde binding site (color orange), not NAD <sup>+</sup> binding site (color blue). It is very difficult to screen NAD <sup>+</sup> competitive inhibitors.                                                                         |
| IDH1<br>( <a href="#">bioassay/602179</a> )  | Enzymatic assay, most of current available co-crystallized inhibitors bind to the well-known allosteric binding site (color orange), not NAD <sup>+</sup> binding site (color blue). In addition, most compounds are selective for R132H, not wild type. The R132H residue locates at this allosteric binding site. |
| KAT2A<br>( <a href="#">bioassay/504327</a> ) | Enzymatic assay, it uses acetyl-CoA as substrate and measures the formation of reduced CoA based on fluorescent signal. Thus, the catalytic site at HAT domain (color orange) was selected as the docking site, not BRD domain (color blue).                                                                        |

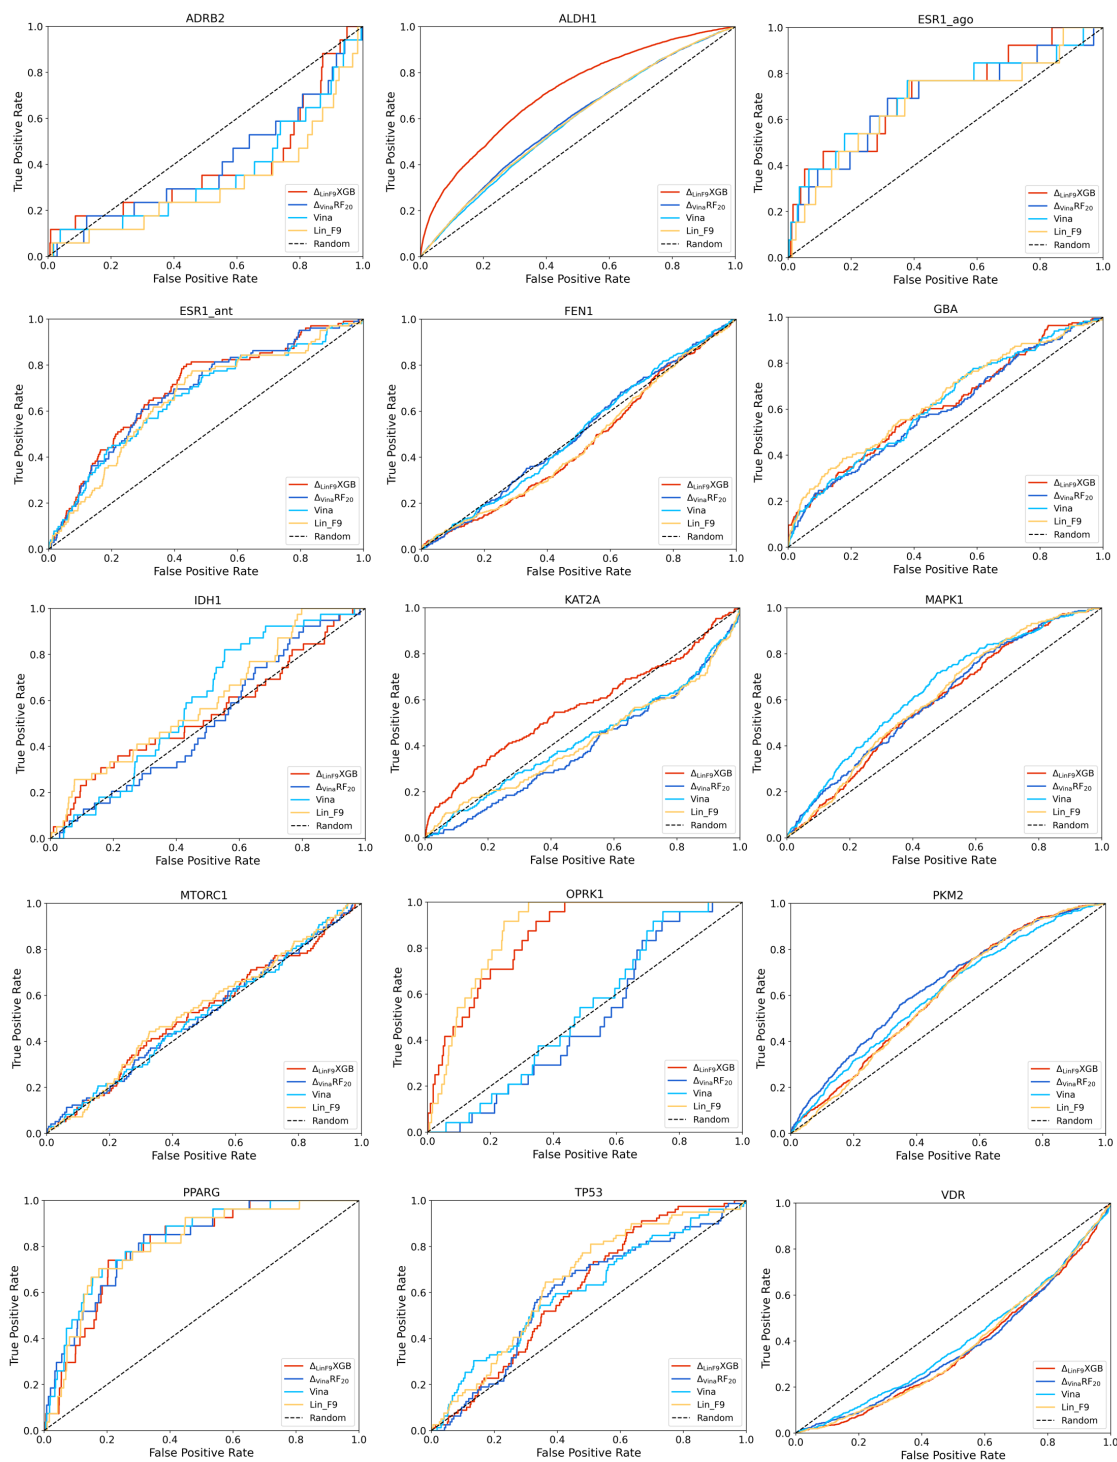

**Figure S8.** ROC curves for 15 targets in docking-based virtual screening of LIT-PCBA benchmark.

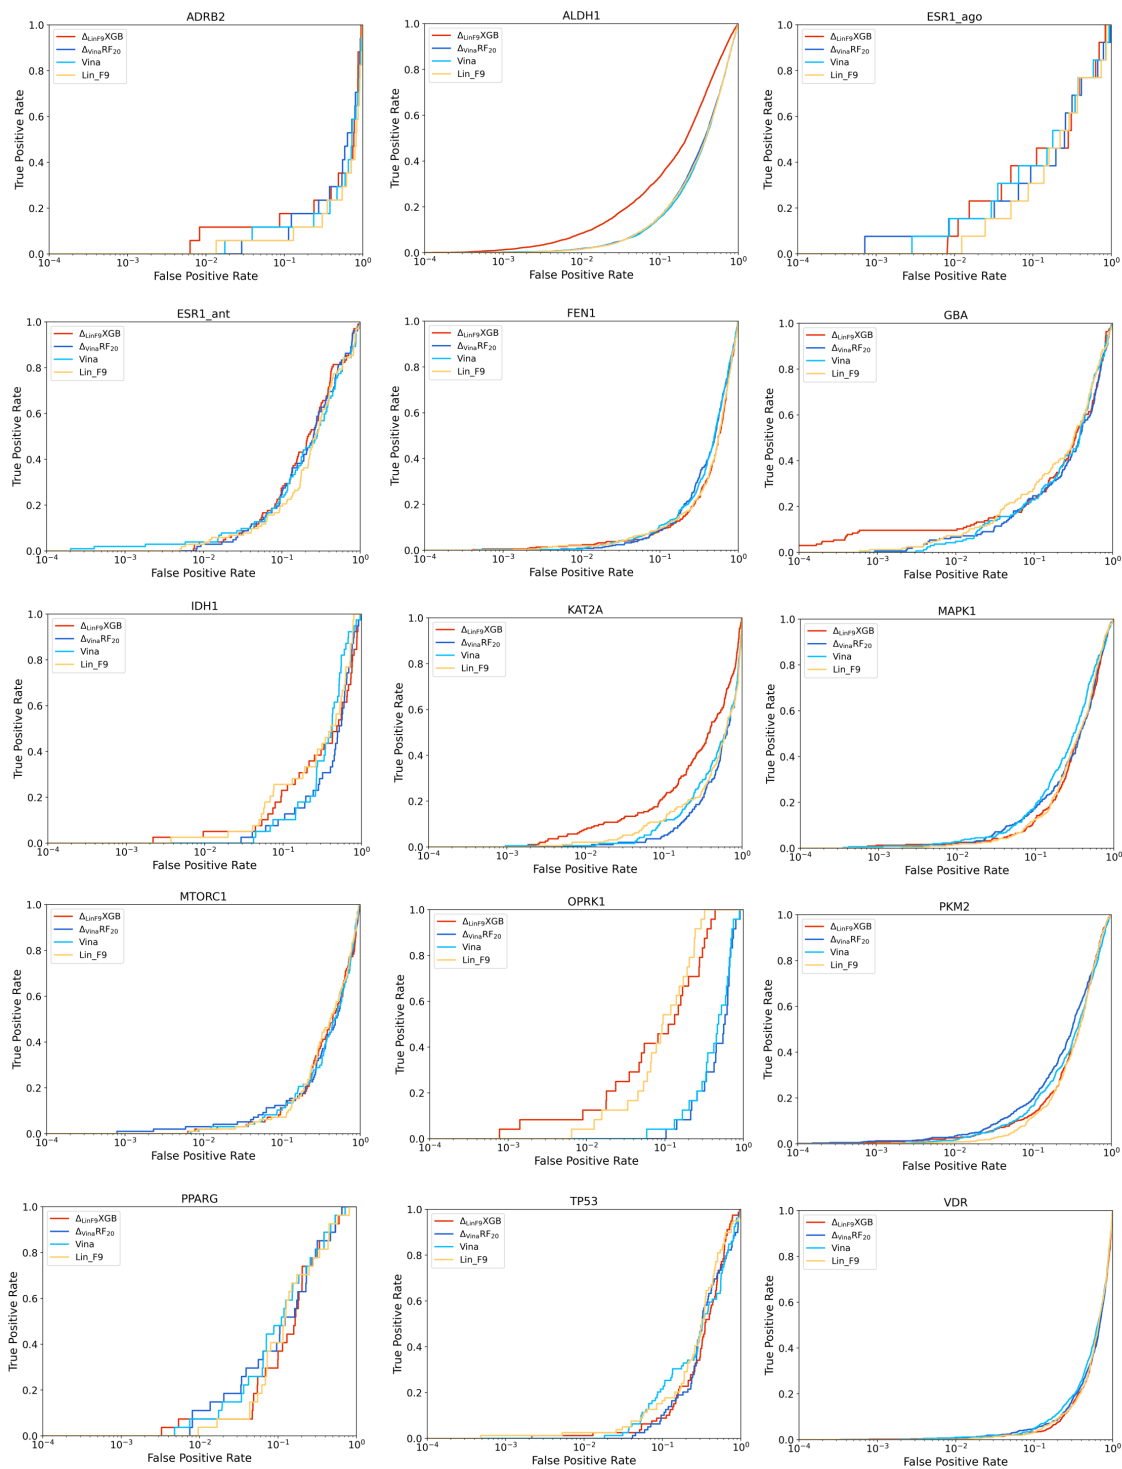

**Figure S9.** ROC curves for 15 targets in docking-based virtual screening of LIT-PCBA benchmark. Different from Figure S8, here focus is given to early enrichments by scaling false positive rates in logarithmic units.
